# Supplementary material for: Synthesis of novel l-N-MCd4T as a potent anti-HIV agent
Source: Royal Society of Chemistry journal article supplement (doi:10.1039/b612537a), 2006-01-01

Copies of NMR Spectra

For

**Synthesis of novel L-N-MCd4T as a potent anti-HIV agent**

Ah-Young Park,<sup>a</sup> Hyung Ryong Moon,<sup>\*a</sup> Kyung Ran Kim,<sup>a</sup> Moon Woo Chun<sup>b</sup> and Lak Shin Jeong<sup>\*c</sup>

1. <sup>1</sup>H NMR spectrum of compound **8**: page 2
2. <sup>13</sup>C NMR spectrum of compound **8**: page 3
3. <sup>1</sup>H NMR spectrum of compound **9**: page 4
4. <sup>13</sup>C NMR spectrum of compound **9**: page 5
5. <sup>1</sup>H NMR spectrum of compound (2S)-**10**: page 6
6. <sup>13</sup>C NMR spectrum of compound (2S)-**10**: page 7
7. <sup>1</sup>H NMR spectrum of (2R)-**10** (diastereomer of compound (2S)-**10**): page 8
8. <sup>13</sup>C NMR spectrum of (2R)-**10** (diastereomer of compound (2S)-**10**): page 9

\*\*\* Current Data Parameters \*\*\*

NAME : MHRD  
EXPNO : 101  
PROCNO : 1

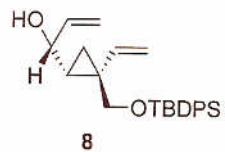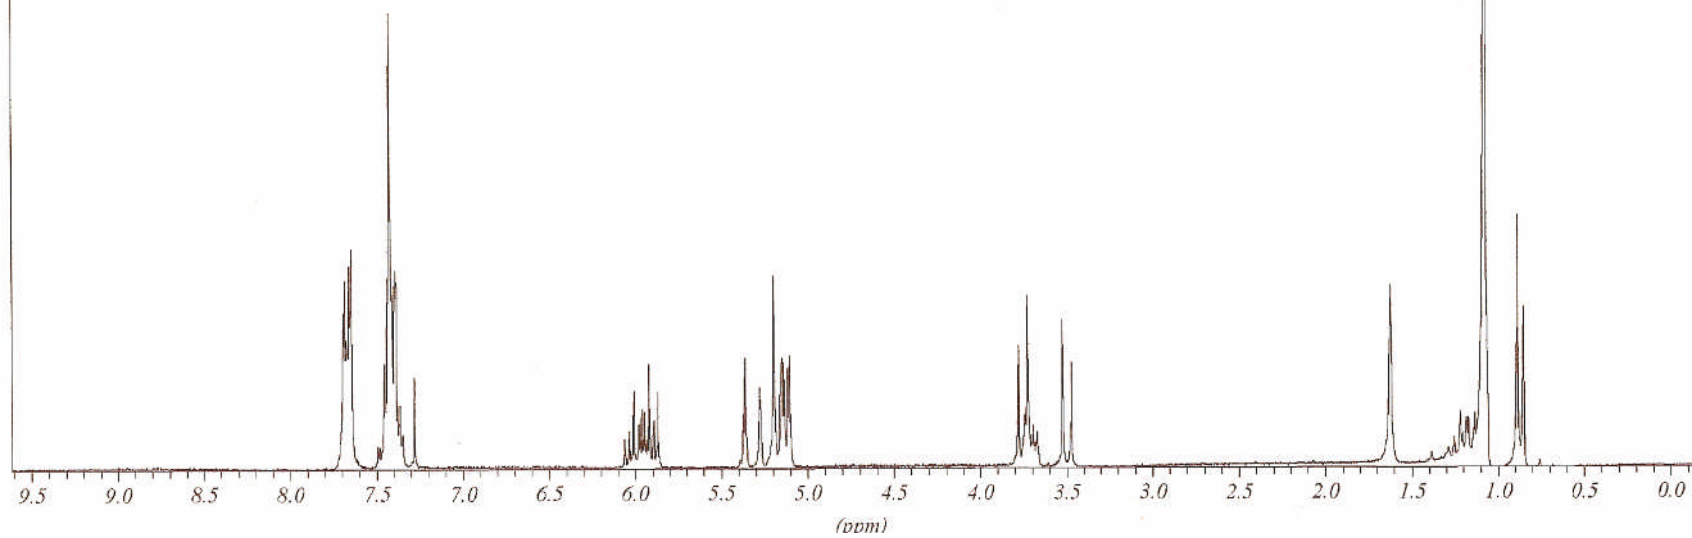

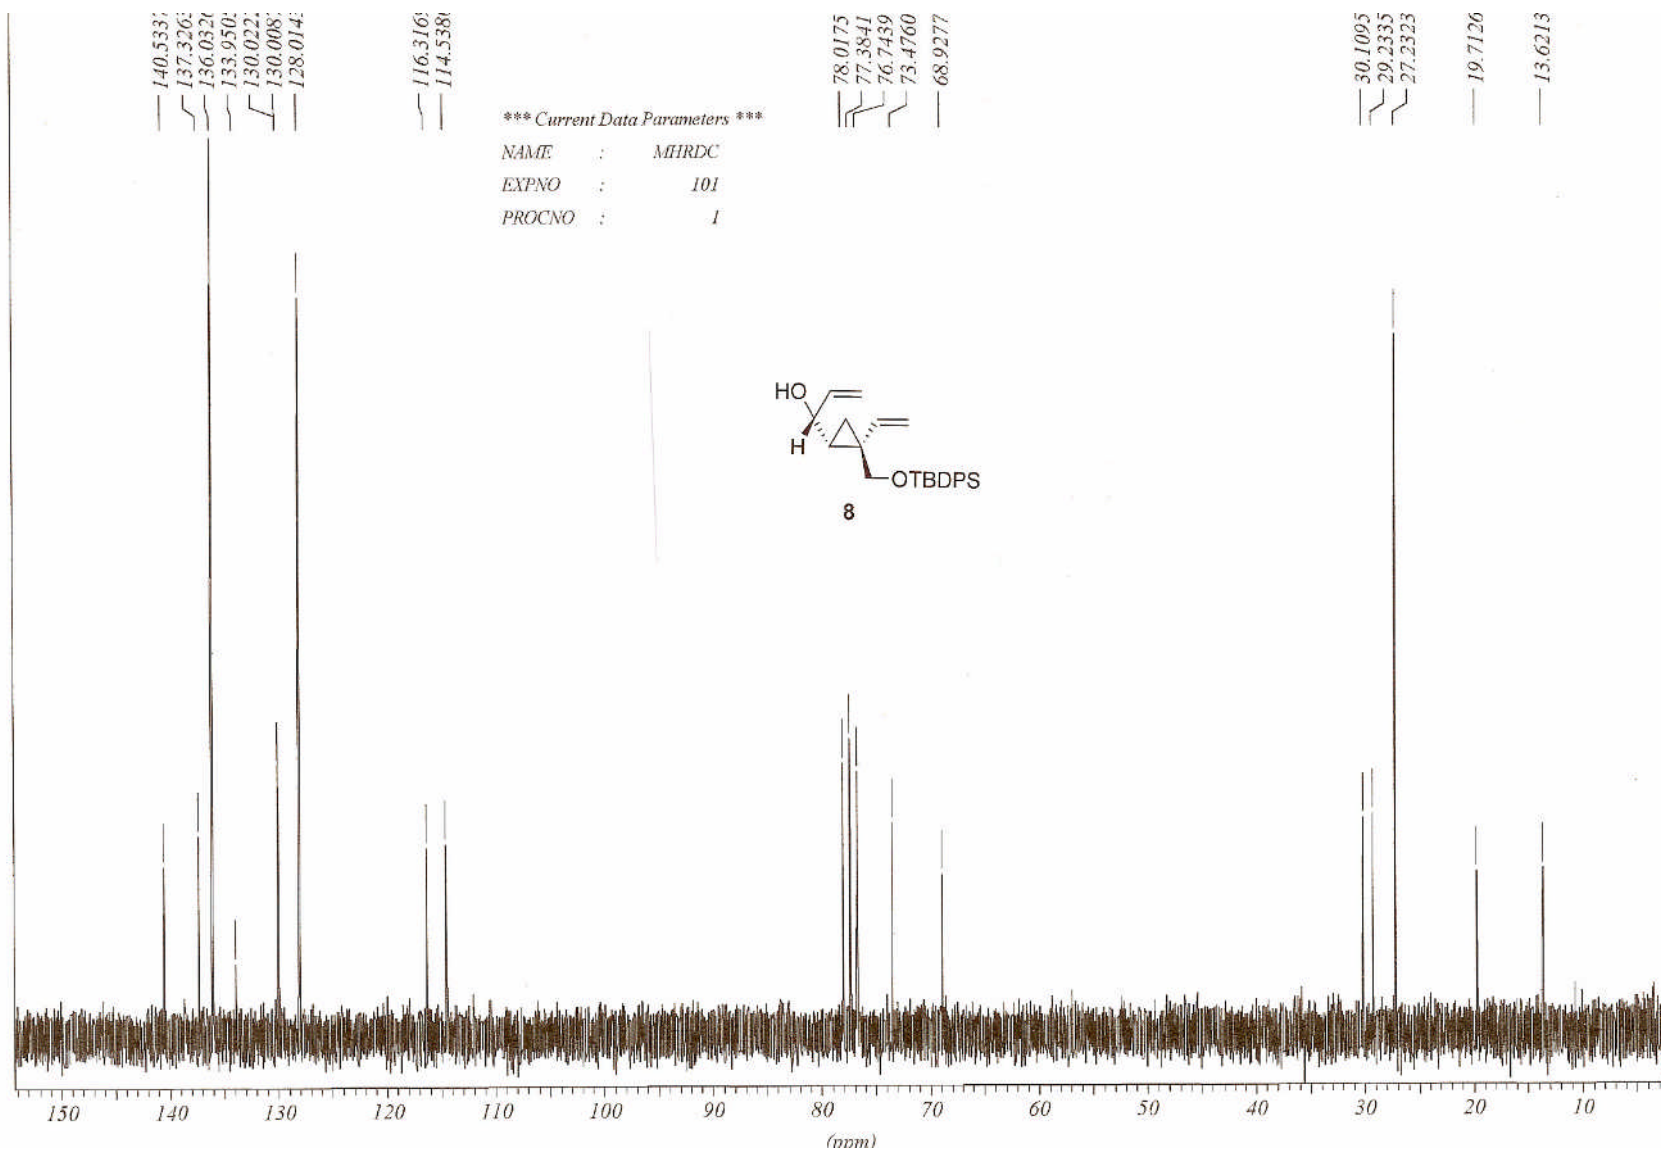

\*\*\* Crystal Data Parameters \*\*\*

NAME : 307RU  
EXPNO : 101  
PROCNO : 1

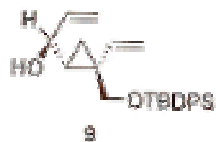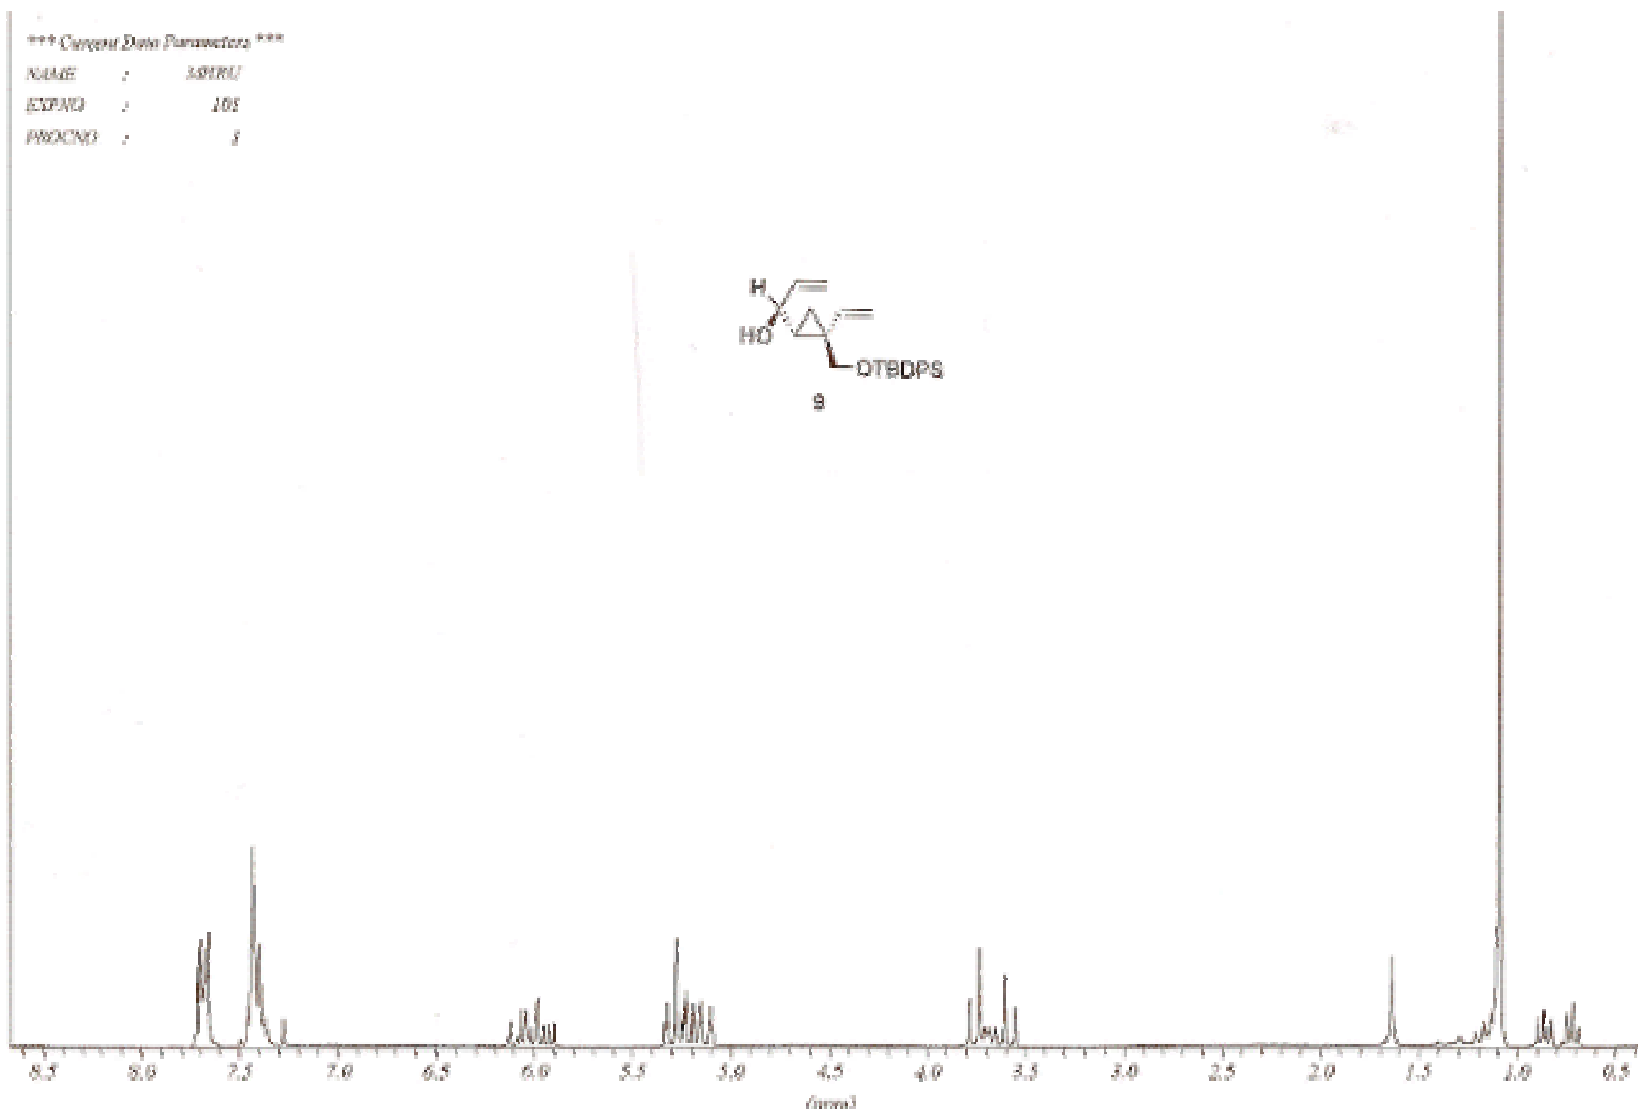

\*\*\* Current Data Parameters \*\*\*

NAME : MHRUC

EXPNO : 101

PROCNO : 1

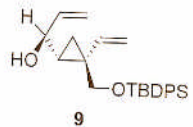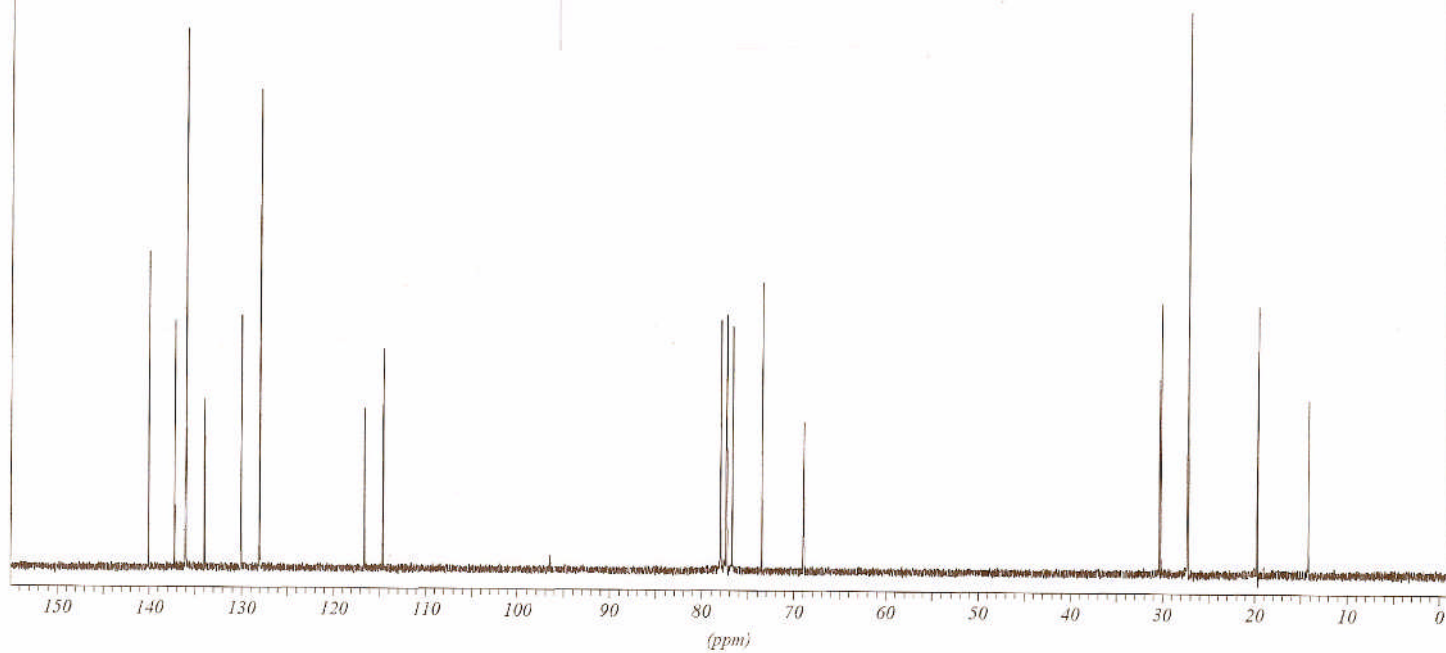

mhr-127

Pulse Sequence: s2pu1  
Solvent: CDCl3  
Ambient temperature  
INDVA-500 "nmr500"

Relax. delay 1.000 sec  
Pulse 32.4 degrees  
Acq. time 1.892 sec  
Width 8000.0 Hz  
32 repetitions  
OBSERVE H1, 499.7811384 MHz  
DATA PROCESSING  
FT size 32768  
Total time 1 min, 32 sec

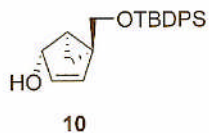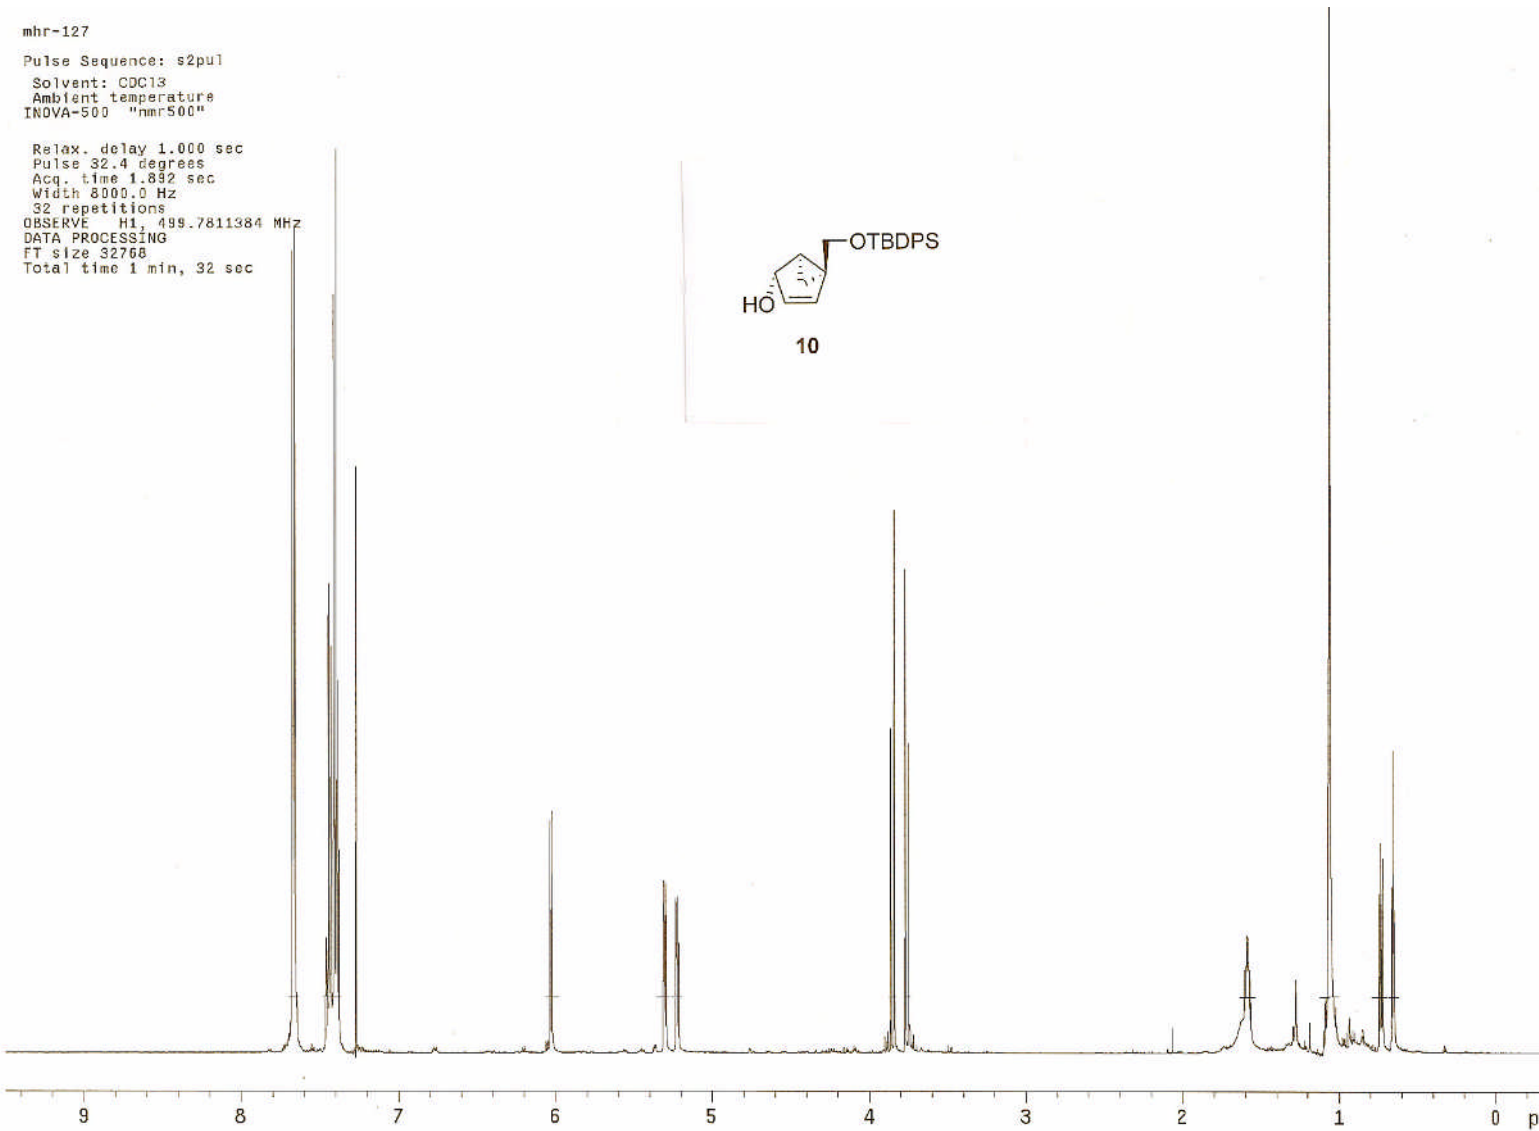

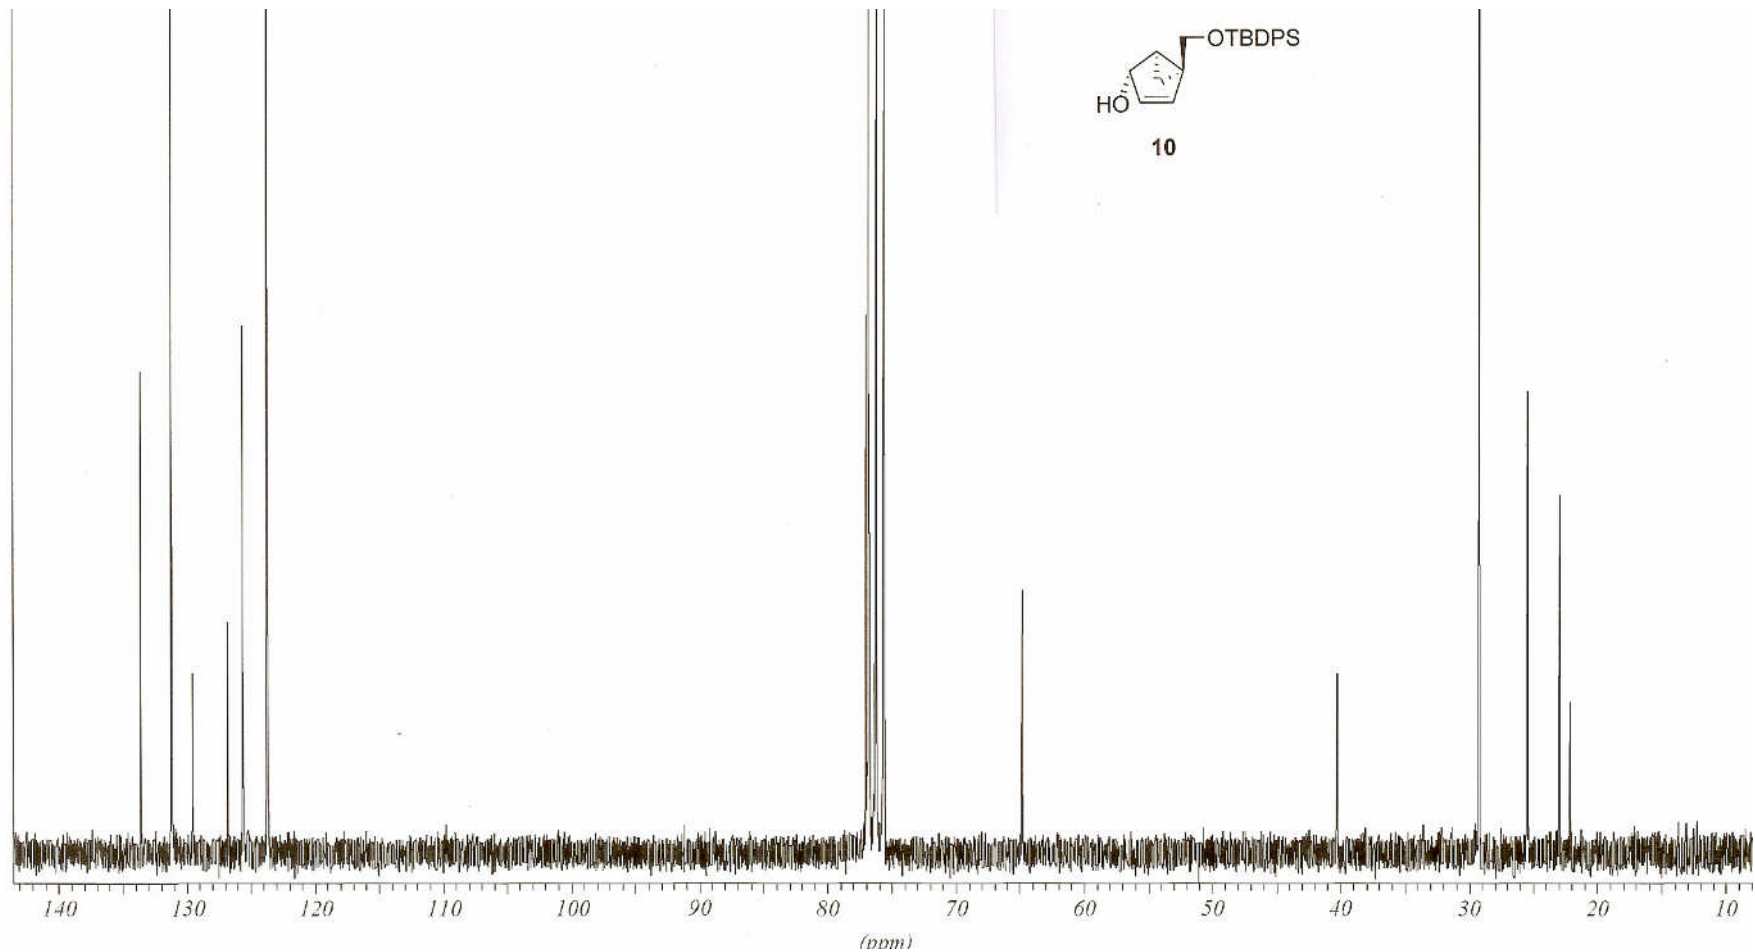

MRK-130

Pulse Sequence: s2pu1  
Solvent: CDCl3  
Temp. 23.0 C / 296.1 K  
INCA-500 "nmr500"

Relax. delay 1.000 sec  
Pulse 35.2 degrees  
Acq. time 1.892 sec  
Width 8000.0 Hz  
16 repetitions  
OBSERVE H1, 499.7811325 MHz  
DATA PROCESSING  
FT size 32768  
Total time 0 min, 46 sec

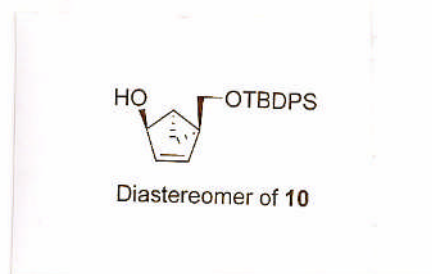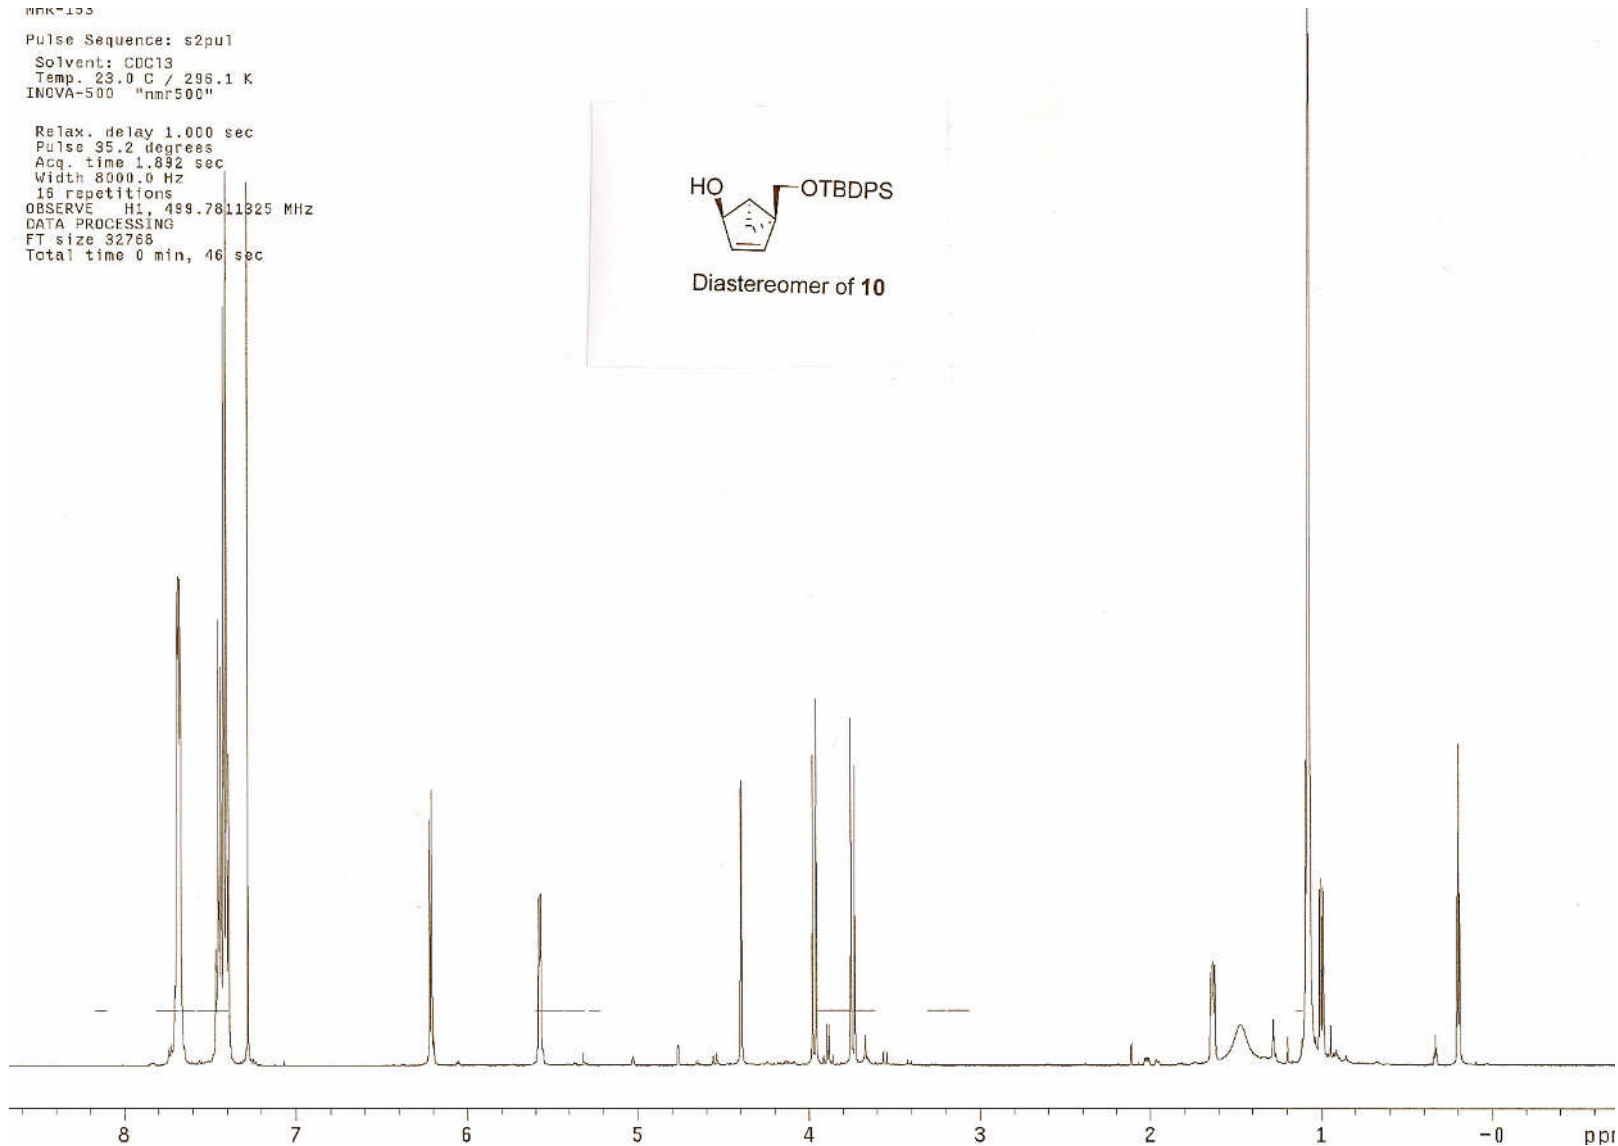



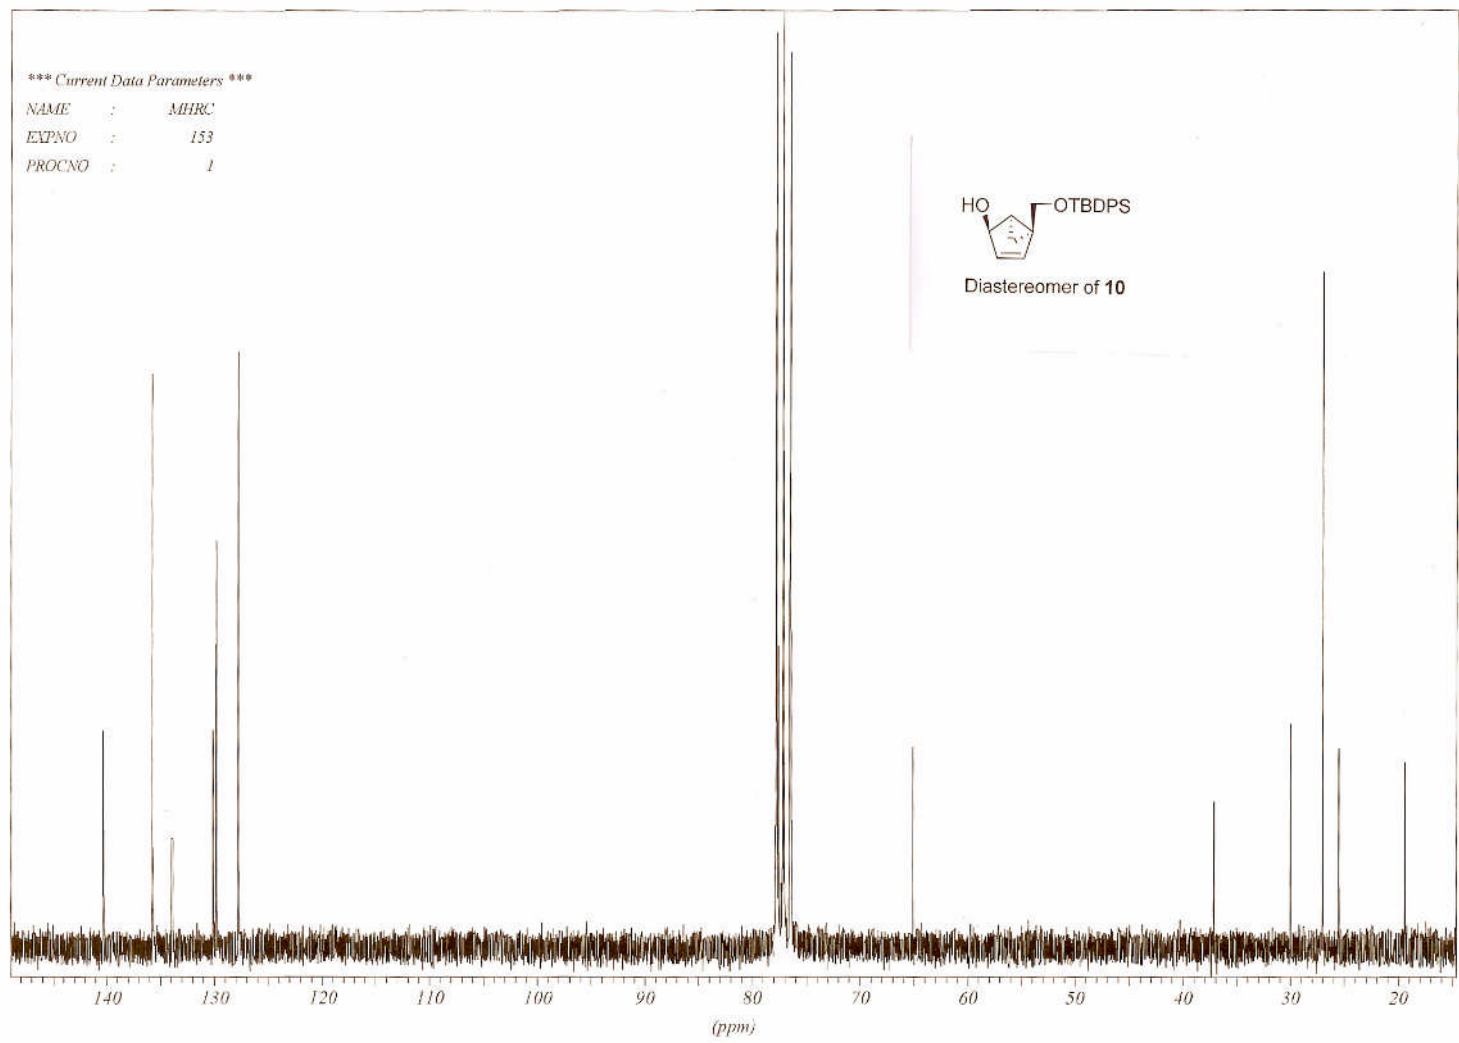

Supplement: b612537a.pdf [file b612537a.pdf]
